# Supplementary material
Source: PubMed Central journal article supplement (PMC3636998)

**CaMKII is a novel regulator of diacylglycerol lipase- $\alpha$  and striatal endocannabinoid signaling**

Brian C. Shonesy<sup>1</sup>, Xiaohan Wang<sup>2,3</sup>, Kristie L. Rose<sup>4</sup>, Teniel S. Ramikie<sup>2,5</sup>, Victoria S. Cavener<sup>2</sup>, Tyler Rentz<sup>1</sup>, Anthony J. Baucum II<sup>1</sup>, Nidhi Jalan-Sakrikar<sup>1</sup>, Ken Mackie<sup>7</sup>, Danny G. Winder<sup>1,2,6</sup>, Sachin Patel<sup>1,2,5,6\*</sup>, Roger J. Colbran<sup>1,2,6\*</sup>

<sup>1</sup>Department of Molecular Physiology and Biophysics,

<sup>2</sup>Vanderbilt Brain Institute,

<sup>3</sup>Vanderbilt International Scholar Program,

<sup>4</sup>Department of Biochemistry,

<sup>5</sup>Department of Psychiatry,

<sup>6</sup>Vanderbilt-Kennedy Center for Research on Human Development,  
Vanderbilt University School of Medicine, Nashville, TN, USA

<sup>7</sup>The Gill Center and the Department of Psychological & Brain Sciences, Indiana University,  
Bloomington, IN, USA

**Supplementary Materials**

Supplementary Tables 1-2

Supplementary Figures 1-7

**Supplemental Table 1.** Proteins identified in DGL $\alpha$  immune complexes isolated from mouse striatum. DGL $\alpha$  was immunoprecipitated from a mouse striatal extract and analyzed by LC/MS/MS. The table lists UNIPROT accession numbers of the proteins identified, along with gene and protein names, the percent coverage and the number of spectral counts. This listing excludes common contaminants (i.e., mouse/human keratin).

| Accession Number | Gene Name | Protein Name                                                        | Coverage (%) | Spectral Counts |
|------------------|-----------|---------------------------------------------------------------------|--------------|-----------------|
| P11798           | Camk2a    | Calcium/calmodulin-dependent protein kinase type II subunit alpha   | 39           | 25              |
| Q62108           | Dlg4      | Postsynaptic density protein 95 (PSD95)                             | 37           | 22              |
| Q4ACU6           | Shank3    | SH3 and multiple ankyrin repeat domains protein 3 (Shank3)          | 19           | 22              |
| P28652           | Camk2b    | Calcium/calmodulin-dependent protein kinase type II subunit beta    | 36           | 19              |
| A4FU75           | Dagla     | Diacylglycerol lipase alpha                                         | 15           | 17              |
| P60710           | Actb      | Actin, cytoplasmic 1 ( $\beta$ -actin)                              | 38           | 15              |
| Q922Y3           | Homer1    | Homer protein homolog 1                                             | 34           | 14              |
| P62737           | Acta2     | Actin, aortic smooth muscle ( $\alpha$ -actin-2)                    | 25           | 12              |
| P99024           | Tubb5     | Tubulin beta-5 chain                                                | 22           | 12              |
| Q7TMM9           | Tubb2a    | Tubulin beta-2A chain                                               | 19           | 11              |
| B1AZ43           | Baiap2    | Brain-specific angiogenesis inhibitor 1-associated protein 2        | 19           | 9               |
| Q91XM9           | Dlg2      | Postsynaptic density protein PSD-93                                 | 10           | 6               |
| P68373           | Tuba1c    | Tubulin alpha-1C chain                                              | 18           | 6               |
| Q6PFD5           | Dlgap3    | PSD-95/SAP90-binding protein 3 (SAPAP3)                             | 8            | 6               |
| P68368           | Tuba4a    | Tubulin alpha-4A chain                                              | 16           | 5               |
| D2KHZ9           | Gapdh     | Glyceraldehyde-3-phosphate dehydrogenase                            | 21           | 5               |
| P51881           | Slc25a5   | ADP/ATP translocase 2                                               | 17           | 4               |
| P19246           | Nefn      | Neurofilament heavy polypeptide                                     | 2            | 3               |
| A4GZ26           | Iqsec2    | ARF6 guanine nucleotide exchange factor (IQArfGEF)                  | 2            | 3               |
| Q8R0S2           | Iqsec1    | IQ motif and SEC7 domain-containing protein 1                       | 3            | 3               |
| P08551           | Nefl      | Neurofilament light polypeptide                                     | 5            | 3               |
| Q8BJ42           | Dlgap2    | PSD-95/SAP90-binding protein 2 (SAPAP2)                             | 2            | 2               |
| Q03265           | Atp5a1    | ATP synthase subunit alpha, mitochondrial                           | 5            | 2               |
| Q3U6C7           | Sucla2    | Succinyl-CoA ligase [ADP-forming] subunit beta, mitochondrial       | 4            | 2               |
| P17897           | Lyz1      | Lysozyme C-1                                                        | 14           | 2               |
| Q8BIZ1           | Anks1b    | Ankyrin repeat and sterile alpha motif domain-containing protein 1B | 2            | 2               |

**Supplementary Table 2.** Target peptides and selected transitions for MRM analysis. For detailed explanation see Experimental Methods.

| Peptide Sequence       | Modification State | Precursor |        | Collision Energy | Product  |        |                                   |
|------------------------|--------------------|-----------|--------|------------------|----------|--------|-----------------------------------|
|                        |                    | m/z       | Charge |                  | m/z      | Charge | Ion                               |
| GSPSLHAVLER            | unmodified         | 583.3198  | 2      | 20               | 417.2456 | 1      | y3                                |
|                        |                    | 583.3198  | 2      | 20               | 516.3140 | 1      | y4                                |
|                        |                    | 583.3198  | 2      | 20               | 587.3511 | 1      | y5                                |
|                        |                    | 583.3198  | 2      | 20               | 724.4100 | 1      | y6                                |
|                        |                    | 583.3198  | 2      | 20               | 511.2931 | 2      | y9                                |
| GSPSLHAVLER            | pSer 808           | 623.3030  | 2      | 22               | 417.2456 | 1      | y3                                |
|                        |                    | 623.3030  | 2      | 22               | 516.3140 | 1      | y4                                |
|                        |                    | 623.3030  | 2      | 22               | 587.3511 | 1      | y5                                |
|                        |                    | 623.3030  | 2      | 22               | 724.4100 | 1      | y6                                |
|                        |                    | 623.3030  | 2      | 22               | 551.2763 | 2      | y9                                |
|                        |                    | 623.3030  | 2      | 22               | 502.2878 | 2      | y9-H <sub>3</sub> PO <sub>4</sub> |
| RAPLATMESLSDTESLYSFDSR | unmodified         | 826.0602  | 3      | 34               | 524.2463 | 1      | y4                                |
|                        |                    | 826.0602  | 3      | 34               | 611.2784 | 1      | y5                                |
|                        |                    | 826.0602  | 3      | 34               | 774.3417 | 1      | y6                                |
|                        |                    | 826.0602  | 3      | 34               | 887.4258 | 1      | y7                                |
|                        |                    | 826.0602  | 3      | 34               | 974.4578 | 1      | y8                                |
| RAPLATMESLSDTESLYSFDSR | pSer 782           | 852.7156  | 3      | 35               | 524.2463 | 1      | y4                                |
|                        |                    | 852.7156  | 3      | 35               | 611.2784 | 1      | y5                                |
|                        |                    | 852.7156  | 3      | 35               | 774.3417 | 1      | y6                                |
|                        |                    | 852.7156  | 3      | 35               | 887.4258 | 1      | y7                                |
|                        |                    | 852.7156  | 3      | 35               | 974.4578 | 1      | y8                                |

**Supplemental Figure 1.** Original unmodified images used to generate figures. **(a)** Images of the entire CaMKII blots that were cropped to generate Fig. 1d. The Non-Phos and P-T286 samples were analyzed in parallel on separate blots, and the films were exposed for the identical time. **(b)** Protein stain and  $^{32}\text{P}$  autoradiograph of the entire gel that was cropped to generate Fig. 2g. Autophosphorylation of CaMKII resulted in the  $\approx 50$  kDa band indicated on the autoradiograph. **(a,b)** BSA was included in these assays, and is indicated.

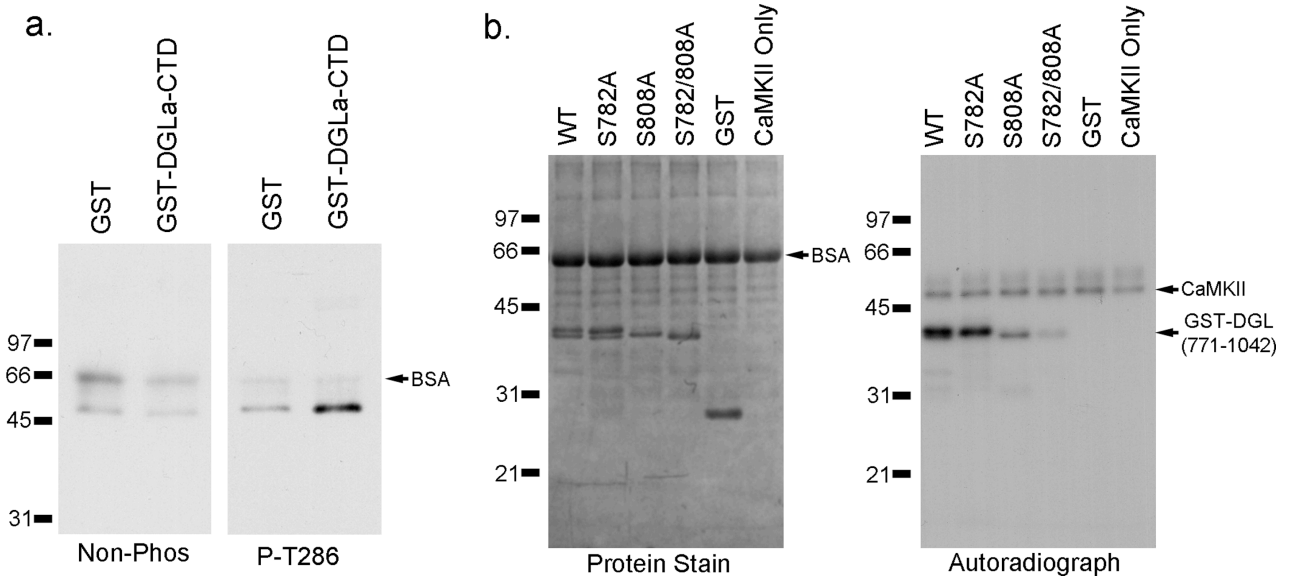

**Supplemental Figure 2.** CaMKII $\alpha$  is autophosphorylated at Thr286 in HEK293 cells. HEK293 cells expressing WT CaMKII $\alpha$  or T286A-CaMKII $\alpha$  were lysed for analysis by western blot using antibodies to total CaMKII $\alpha$  or to phospho-Thr286 CaMKII $\alpha$ . The WT protein is significantly autophosphorylated under these basal culture conditions, consistent with prior reports (Jalan-Sakrikar et al., 2011).

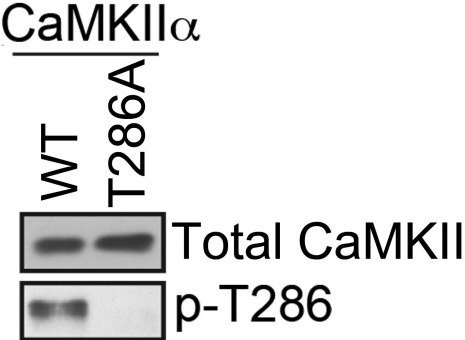

**Supplementary Figure 3.** Chromatographic profiles following MRM analysis of phosphorylated DGL $\alpha$  peptides 805–815 (GSPSLHAVLER, **a–c**) and 774–795 (RAPLATMESLSDTESLYSFDSR, **d–f**) from HEK293T cells. (**a, d**) Tryptic peptides derived from GST-DGL $\alpha$ (761–870) phosphorylated *in vitro* by CaMKII $\alpha$  at Ser<sup>808</sup> and Ser<sup>782</sup> (Fig. 2) were used as peptide standards for MRM method development. Chromatographic profiles are shown for the transition intensities observed upon targeted analysis of the two phosphorylated peptides. The intensities for each product ion monitored are plotted over time as the targeted precursor peptide is eluted into the mass spectrometer for analysis. The retention time at the peak apex of the most intense transition is provided for each peptide analyzed. The peptide sequence provided above each set of data is indicated with the specific y-type product ions that were selected for monitoring, and the brackets denote the positions of peptide backbone cleavage events that generate these product ions. Each bracket color represents a single monitored product ion or transition, and the co-eluting chromatographic profiles for each transition are similarly color-coded. (**b, c, e, f**) Identical analysis of phosphorylated full length DGL $\alpha$  purified from lysates of HEK293T cells with (**b, e**) or without (**c, f**) co-expression of constitutively active CaMKII $\alpha$ . The non-phosphorylated forms of both peptides displayed similar relative intensities of individual transitions and were detected at similar levels in (–) and (+) CaMKII $\alpha$  conditions.

In panel (**a**), MRM analysis of *in vitro* phosphorylated DGL $\alpha$  identified phosphorylation at Ser<sup>808</sup> unambiguously. The DGL $\alpha$  tryptic 805–815 peptide fragments in such a manner that enables monitoring of the y<sub>9</sub> product ion as well as the H<sub>3</sub>PO<sub>4</sub> neutral loss y<sub>9</sub> product ion. The presence of these specific y<sub>9</sub> transitions, in combination with y<sub>3</sub>–y<sub>6</sub> allows for specific identification of Ser<sup>808</sup> as the phosphorylated residue. In comparison to panel (**a**), MRM analysis of full length DGL $\alpha$  from HEK293T cells confirms the presence of the Ser<sup>808</sup> phosphorylated peptide after co-expression with CaMKII $\alpha$  (**b**); note the similar relative intensities of individual transition peaks, and the similarity in retention time of the co-eluting transition profiles. In the absence of co-expressed CaMKII $\alpha$  (**c**), the transition intensities for this peptide in the full length DGL $\alpha$  preparation were relatively low, and the presence of the Ser<sup>808</sup>-phosphorylated peptide could not be confirmed in this preparation.

In panel **d**, the fragmentation characteristics of the phosphorylated DGL $\alpha$  peptide 774–795 enabled monitoring of product ions, y<sub>4</sub>–y<sub>8</sub>. The mass of the precursor peptide in combination with the detection of these particular ions confirms the presence of phosphorylated DGL $\alpha$  774–795, and also indicates that phosphorylation must be on one of the four N-terminal Ser or Thr residues. Independent experiments unambiguously identified Ser<sup>782</sup> as the phosphorylation site (Fig. 2). In panel **e**, the co-eluting transition profiles at the same retention time in the analysis of DGL $\alpha$  co-expressed with CaMKII $\alpha$  validate the identification of phosphorylated 774–795 peptide, and suggest that Ser<sup>782</sup> is phosphorylated by CaMKII $\alpha$  in intact 293T cells. In contrast, the presence of this phosphorylated peptide was not confirmed upon analysis of DGL $\alpha$  purified from HEK293T cells that were not co-transfected with CaMKII $\alpha$ .

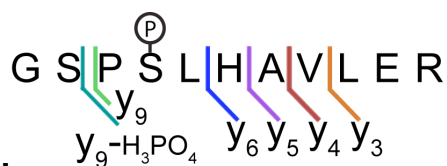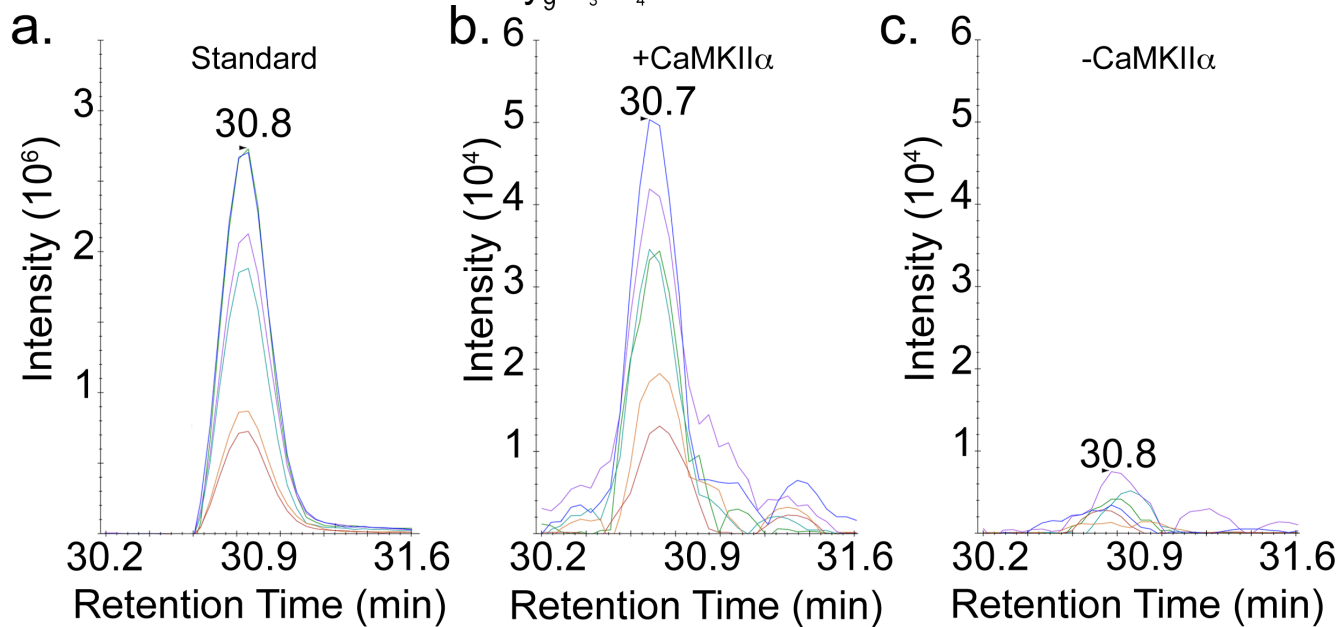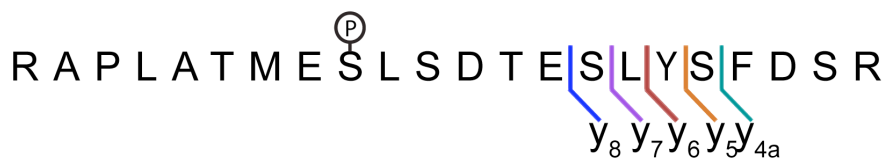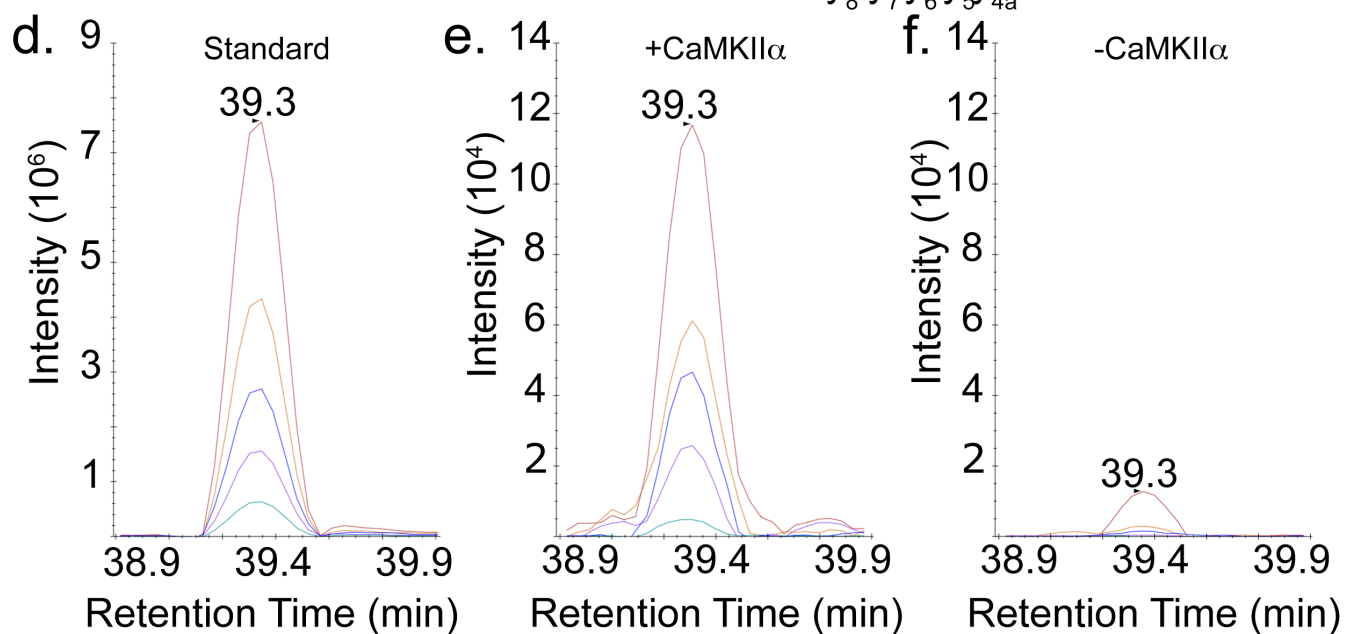

**Supplemental Figure 4.** Basic characterization of the DGL activity assay. **(a)** Time course of DGL activity in striatal membranes following addition of SAG (250  $\mu$ M) is approximately linear up to 30 min. **(b)** SAG concentration-dependence of 2-AG production at 15 min by striatal membranes in the presence of vehicle (black) or tetrahydrolipstatin (THL; 1  $\mu$ M; gray), a DGL inhibitor. THL inhibited 2-AG production as analyzed by 2-way ANOVA: Interaction  $F_{3,6}=179.3$   $p<0.0001$ , SAG  $F_{3,6}=409.7$   $p<0.0001$ , Drug  $F_{1,2}=863.5$   $p=0.0012$ ;  $n=3$  independent experiments), demonstrating that DGL was responsible for the majority of 2-AG production.

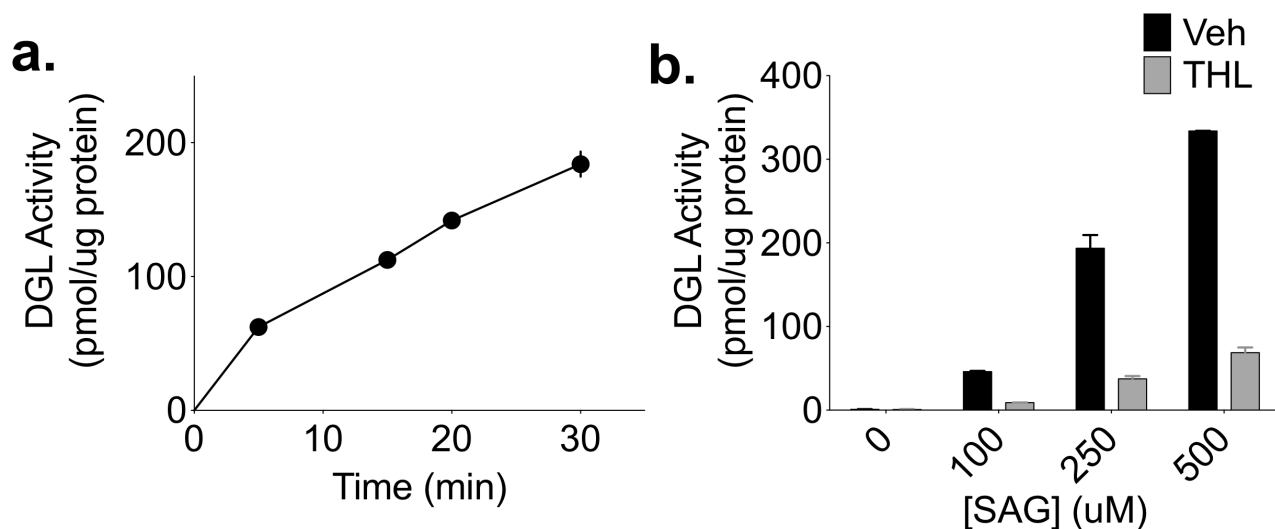



**Supplemental Figure 5. Characterization of striatal DSE in direct and indirect pathway MSNs.**

**(a)** Representative DSE experiment in a randomly selected vehicle-treated MSN is shown. **(b,c)** Summary of average inhibition of eEPSCs by the DSE protocol in vehicle- and rimonabant-treated randomly selected MSNs (Veh  $68 \pm 4\%$ ,  $n=8$  cells from 1 mouse; rimonabant  $94 \pm 2\%$ ,  $n=6$  cells from 1 mouse; analyzed by unpaired two-tailed t-test ( $t_{12}=5.566$ ,  $### p=0.0001$ ). **(d-g)** Effects of different durations of depolarization to induce DSE in **(d,e)** D2(-) and **(f,g)** D2(+) MSNs. Depression was determined by comparing to baseline (100%) by one sample t-test: D2(-) 2 sec:  $99 \pm 4\%$ ,  $t_3=0.3964$ ,  $p=0.7183$ ,  $n=4$  cells from 1 mouse; 3 sec:  $86 \pm 1\%$ ,  $t_4=7.915$ ,  $**p=0.0014$ ,  $n=5$  cells from 1 mouse; 5 sec:  $79 \pm 6\%$ ,  $t_5=3.773$ ,  $*p=0.0130$ ,  $n=6$  cells from 2 mice; 10 sec:  $74 \pm 2\%$ ,  $t_{14}=10.48$ ,  $***p<0.0001$ ,  $n=15$  cells from 4 mice; D2(+) 2 sec:  $92 \pm 4\%$ ,  $t_4=1.911$ ,  $p=0.1286$ ,  $n=5$  cells from 1 mouse; 3 sec:  $91 \pm 2\%$ ,  $t_4=3.029$ ,  $p=0.0388$ ,  $n=5$  cells from 2 mice; 5 sec:  $77 \pm 4\%$ ,  $t_6=6.005$ ,  $0.0010$ ,  $n=7$  cells from 2 mice; 10 sec:  $67 \pm 2\%$ ,  $t_{14}=15.38$ ,  $p<0.0001$ ,  $n=15$  cells from 4 mice. Representative traces are shown for each depolarization time. Calibration bars 20 ms x 150 pA.; \*  $p<0.05$ , \*\*  $p<0.01$ , \*\*\*  $p<0.001$

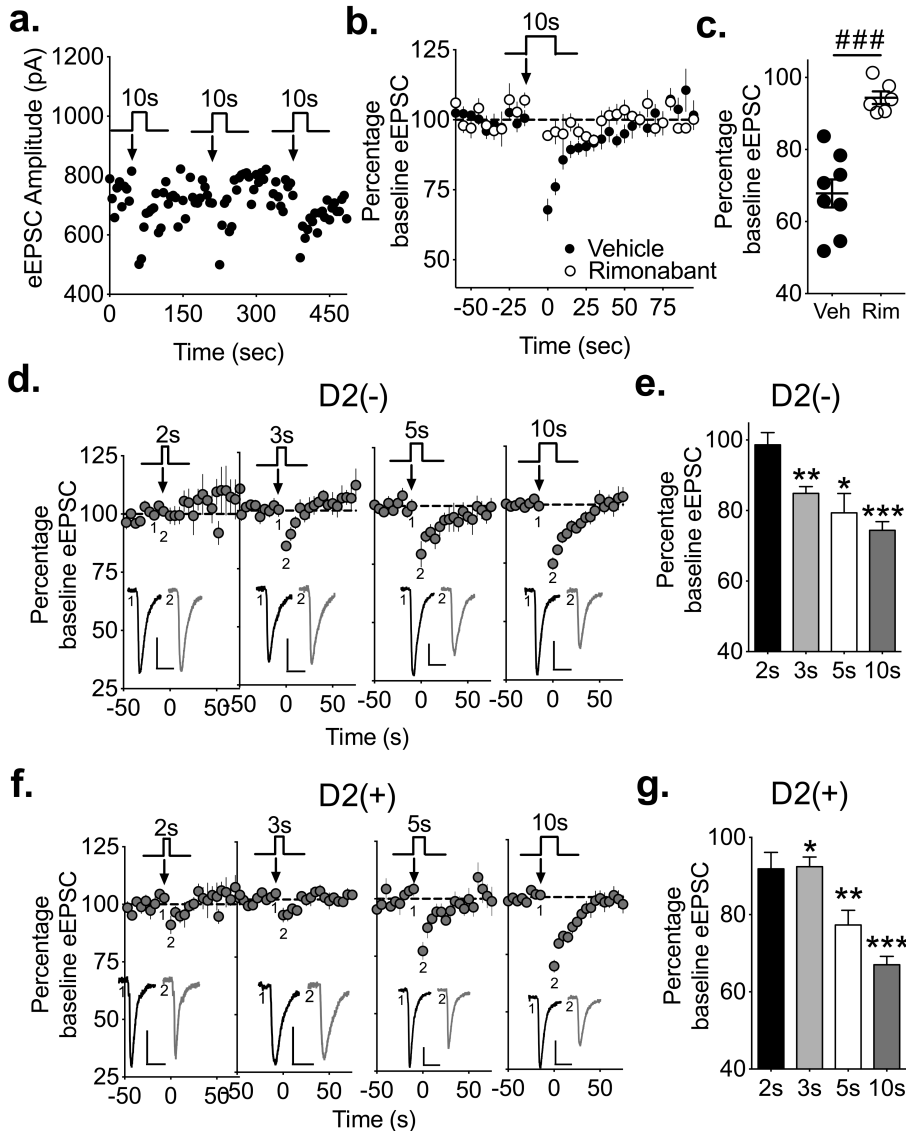

**Supplemental Figure 6.** Comparison of DSE in WT and CaMKII $\alpha$ <sup>T286A/T286A</sup> (KI) MSNs following pretreatment of slices with DHPG (10  $\mu$ M). **(a-d)** DHPG pretreatment prevented differences in DSE in **(a,b)** D2(-) MSNs from WT and KI mice with 3 s depolarization (WT 77 $\pm$ 1%, n=9 cells from 3 mice; KI 78 $\pm$ 3%, n=6 cells from 3 mice). **(c,d)** Addition of DHPG did not reveal differences in DSE between D2(+) MSNs from WT and KI mice with 3 s depolarization (WT 82 $\pm$ 3%, n=9 cells from 3 mice; KI 80 $\pm$ 3%, n=6 cells from 3 mice). Calibration bars 20 ms x 150 pA. **(e,f)** Comparison of DSE in D2(-) MSNs with and without postsynaptic loading of AIP (10  $\mu$ M) following pretreatment of slices with DHPG (10  $\mu$ M). **(e,f)** AIP had no effect on DSE when loaded into WT D2(-) MSNs pretreated with DHPG following 3s depolarization (79.1 $\pm$ 2%, n=6 cells from 2 mice). Data from WT+DHPG cells are identical to WT cells in panels a and b and are replotted here for comparison. **(g)** Comparison of CB1R-agonist induced depression in WT and KI mice. The CB1R agonist WIN55,212-2 produced a similar depression in both WT and KI mice (WT = 55  $\pm$  4, n=8 cells from 7 mice; KI = 53  $\pm$  1, n=5 cells from 5 mice).

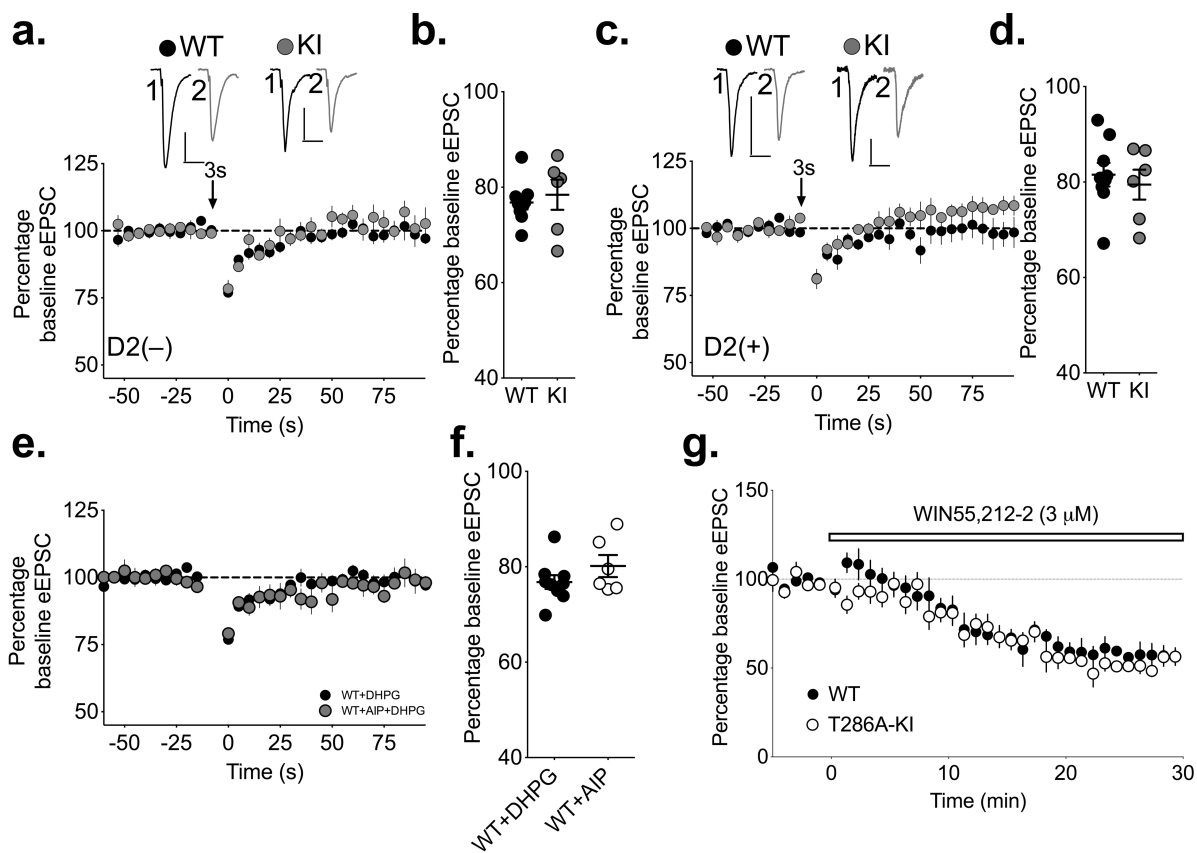

**Supplementary Figure 7.** Home cage monitoring of distance traveled by WT and  $\text{CaMKII}\alpha^{\text{T286A/T286A}}$  (KI) mice over 60 hours. Unlike mice used for the experiment in Fig 5, these mice were not habituated to being singly housed in the same cage they were monitored in. The mice were placed in clean cages and monitoring began immediately. No drugs were administered to these mice. A period of habituation can be seen during the first few hours of the first night. This demonstrates that the mice are fully habituated within 24 hours and that both genotypes maintain a regular circadian locomotor activity pattern for at least 60 hours.

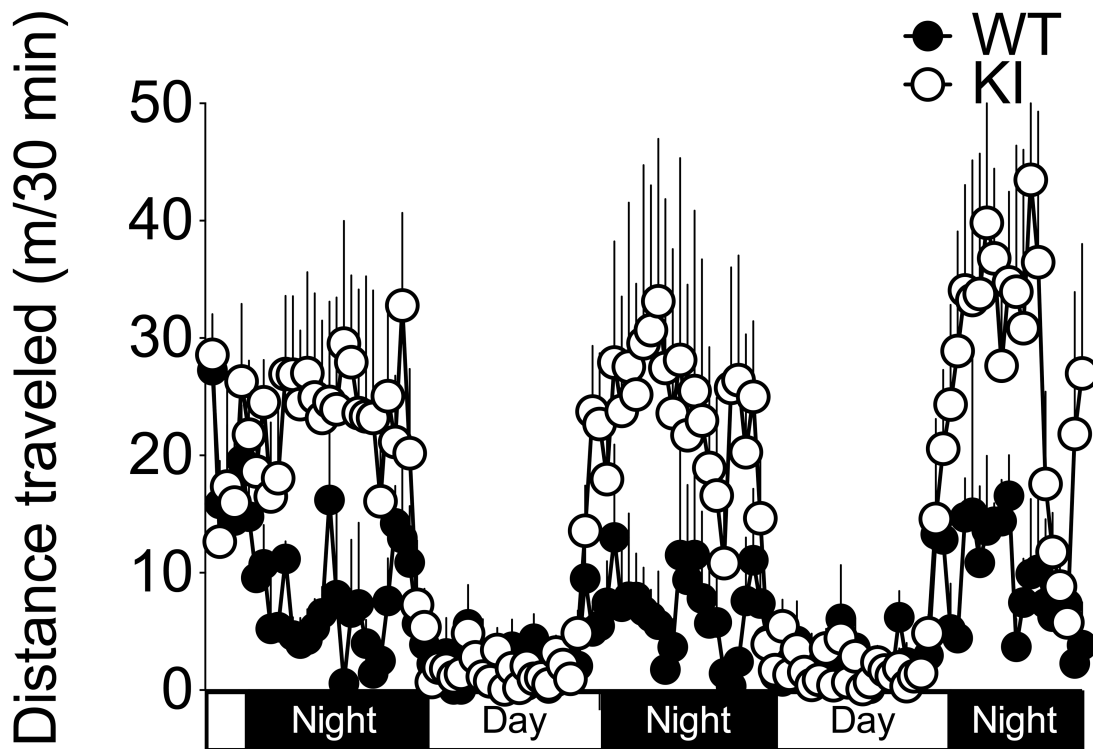

Supplement: NIHMS445833-supplement-1.pdf [file NIHMS445833-supplement-1.pdf]
